# Supplementary material
Source: PubMed Central journal article supplement (PMC4352597)
Supplement: supp_114.220293_jpet220293_suppl_data.pdf [file supp_114.220293_jpet220293_suppl_data.pdf]

**SUPPLEMENTAL INFORMATION:**

**Title: Bias Analyses of Preclinical and Clinical D2 Dopamine Ligands: Studies with Immediate and Complex Signaling Pathways**

**Authors: Tarsis F. Brust, Michael P. Hayes, David L. Roman, Kevin D. Burris, and Val J. Watts**

*Journal of Pharmacology and Experimental Therapeutics*

**Supplemental Table 1:**

| <b>Compound</b> | <b>Log <i>K<sub>i</sub></i></b> |
|-----------------|---------------------------------|
| Dopamine        | -4.83 (±0.04)                   |
| Quinpirole      | -5.03 (±0.09)                   |
| Aripiprazole    | -7.40 (±0.08)                   |
| Lisuride        | -9.27 (±0.17)                   |
| Bromocriptine   | -8.02 (±0.10)                   |
| Rotigotine      | -7.10 (±0.06)                   |
| (+)-3-PPP       | -4.61 (±0.05)                   |
| RNPA            | -7.89 (±0.04)                   |
| Pramipexole     | -5.53 (±0.08)                   |
| Ropinirole      | -5.28 (±0.14)                   |
| Pergolide       | -6.49 (±0.15)                   |

**Table S1:** Affinity constants of the compounds for the D<sub>2</sub> receptor. Log *K<sub>i</sub>* values and standard errors are shown in the table. The results are an average and S.E.M. of at least three independent experiments.

Supplemental Figure S1:

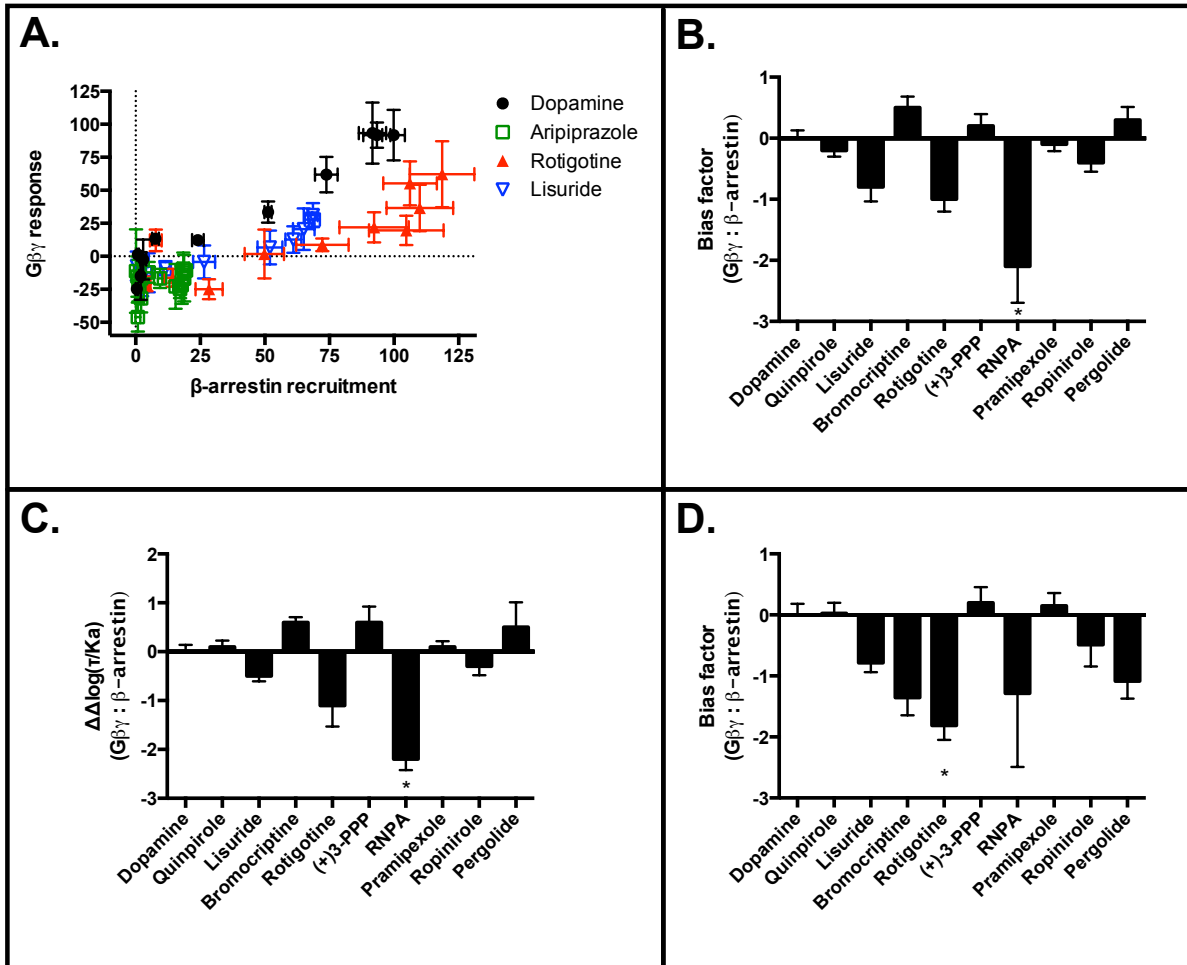

**Figure S1:** Bias analyses of Gβγ activation in comparison to β-arrestin recruitment to the D<sub>2</sub> receptor. **A.** Equimolar comparison. **B.** Equiactive comparison. **C.** Transduction coefficient. **D.** Sigma comparison. Dopamine was used as the reference compound for all the analyses. For the quantitative analyses positive values indicate bias for Gβγ activation; negative values indicate bias for β-arrestin recruitment. Data represent the average and S.E.M. of at least three independent experiments. \**p* < 0.05.

Supplemental Figure S2:

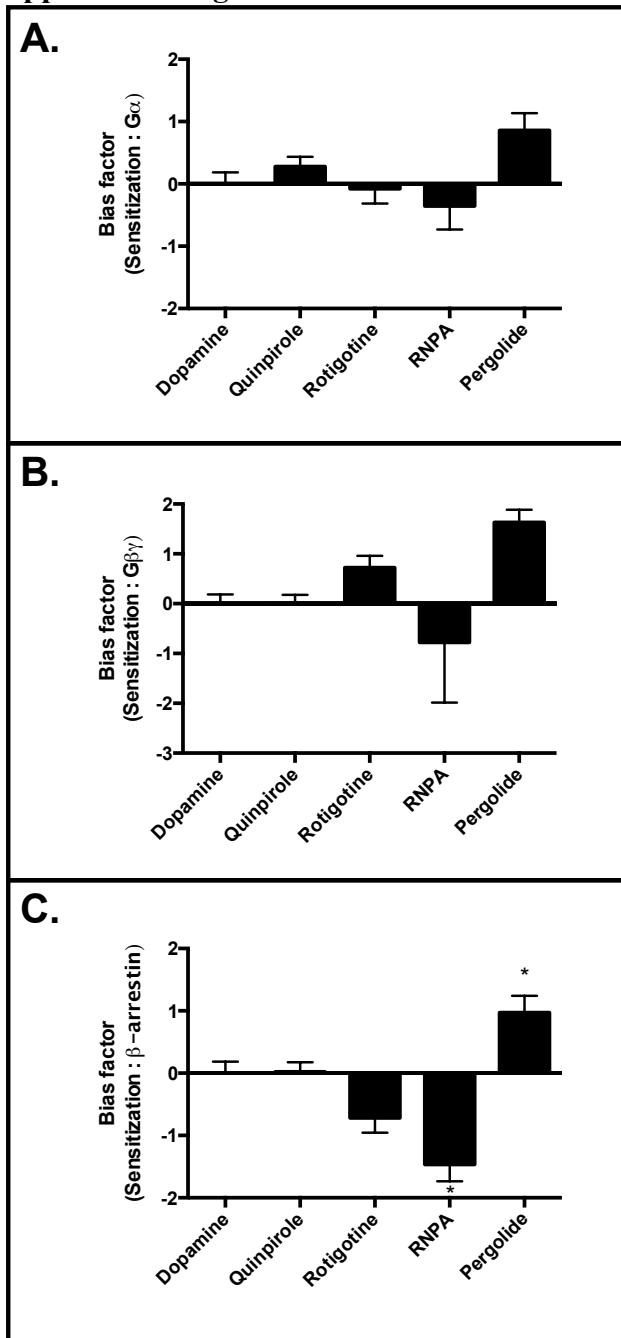

**Figure S2:** Bias analyses using the sigma comparison of heterologous sensitization in comparison to effectors of the D<sub>2</sub> receptor. **A.** Heterologous sensitization in comparison to G $\alpha$ i/o activation. **B.** Heterologous sensitization in comparison to G $\beta\gamma$  activation. **C.** Heterologous sensitization in comparison to  $\beta$ -arrestin recruitment. Dopamine was used as the reference compound for all the analyses. Positive values indicate bias for heterologous sensitization; negative values indicate bias for the immediate D<sub>2</sub> receptor effector under analysis. Data represent the average and S.E.M. of at least three independent experiments. \* $p < 0.05$ .

Supplemental Figure S3:

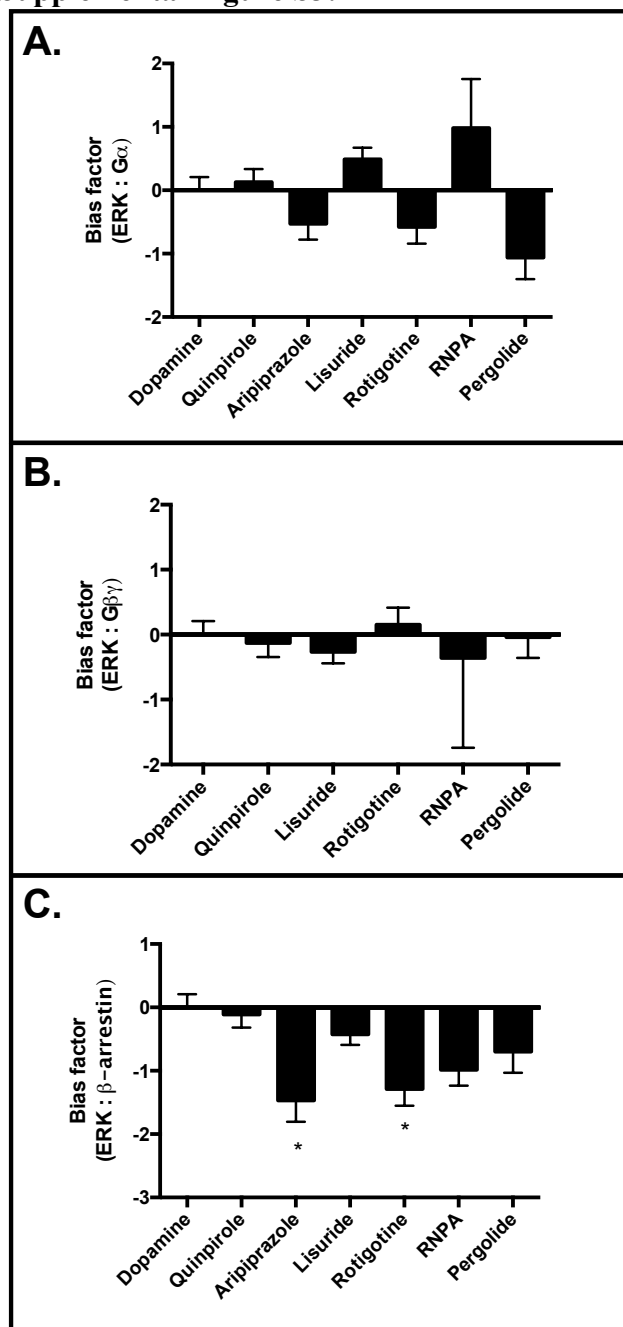

**Figure S3:** Bias analyses using the sigma comparison of ERK phosphorylation in comparison to effectors of the D<sub>2</sub> receptor. **A.** ERK phosphorylation in comparison to G $\alpha$ i/o activation. **B.** ERK phosphorylation in comparison to G $\beta\gamma$  activation. **C.** ERK phosphorylation in comparison to  $\beta$ -arrestin recruitment. Dopamine was used as the reference compound for all the analyses. Positive values indicate bias for ERK phosphorylation; negative values indicate bias for the immediate D<sub>2</sub> receptor effector under analysis. Data are the average and S.E.M. of at least three independent experiments. \* $p < 0.05$ .

Supplemental Figure S4:

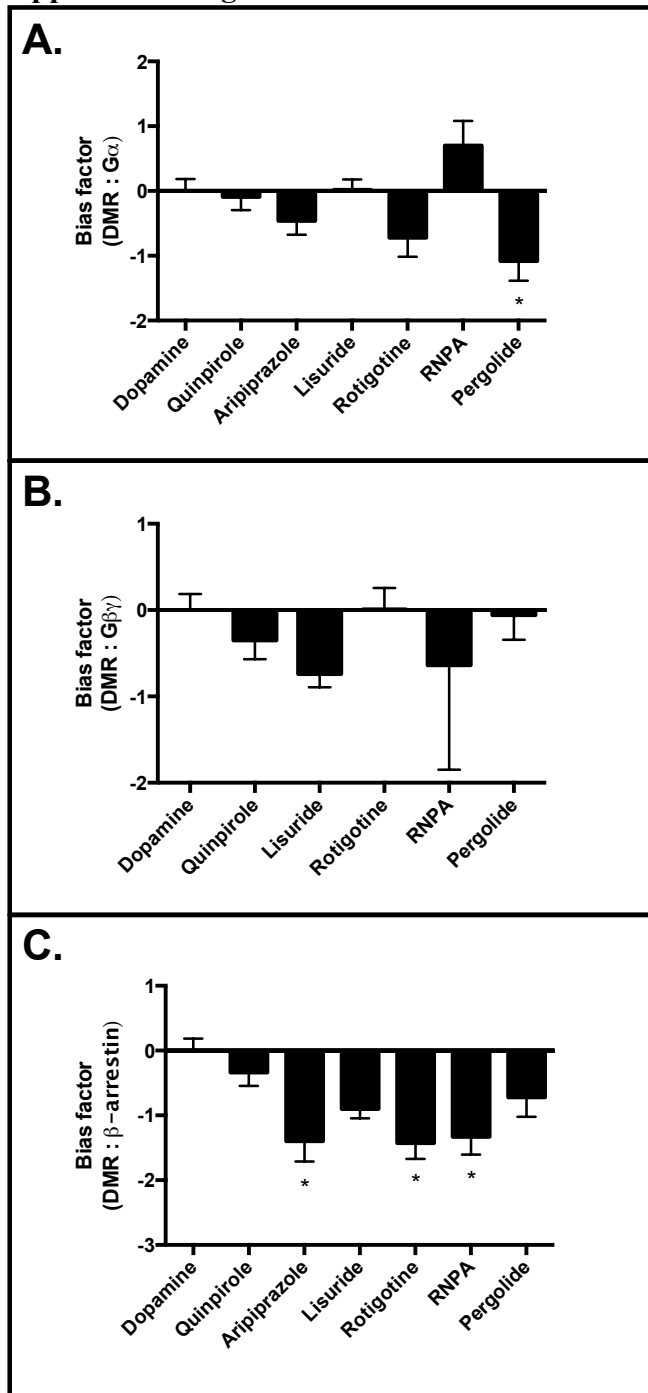

**Figure S4:** Bias analyses using the sigma comparison of DMR in comparison to effectors of the D<sub>2</sub> receptor. **A.** DMR in comparison to G $\alpha$ i/o activation. **B.** DMR in comparison to G $\beta\gamma$  activation. **C.** DMR in comparison to  $\beta$ -arrestin recruitment. Dopamine was used as the reference compound for all the analyses. Positive values indicate bias for DMR; negative values indicate bias for the immediate D<sub>2</sub> receptor effector under analysis. Data are the average and S.E.M. of at least three independent experiments. \* $p < 0.05$ .

Supplemental Figure S5:

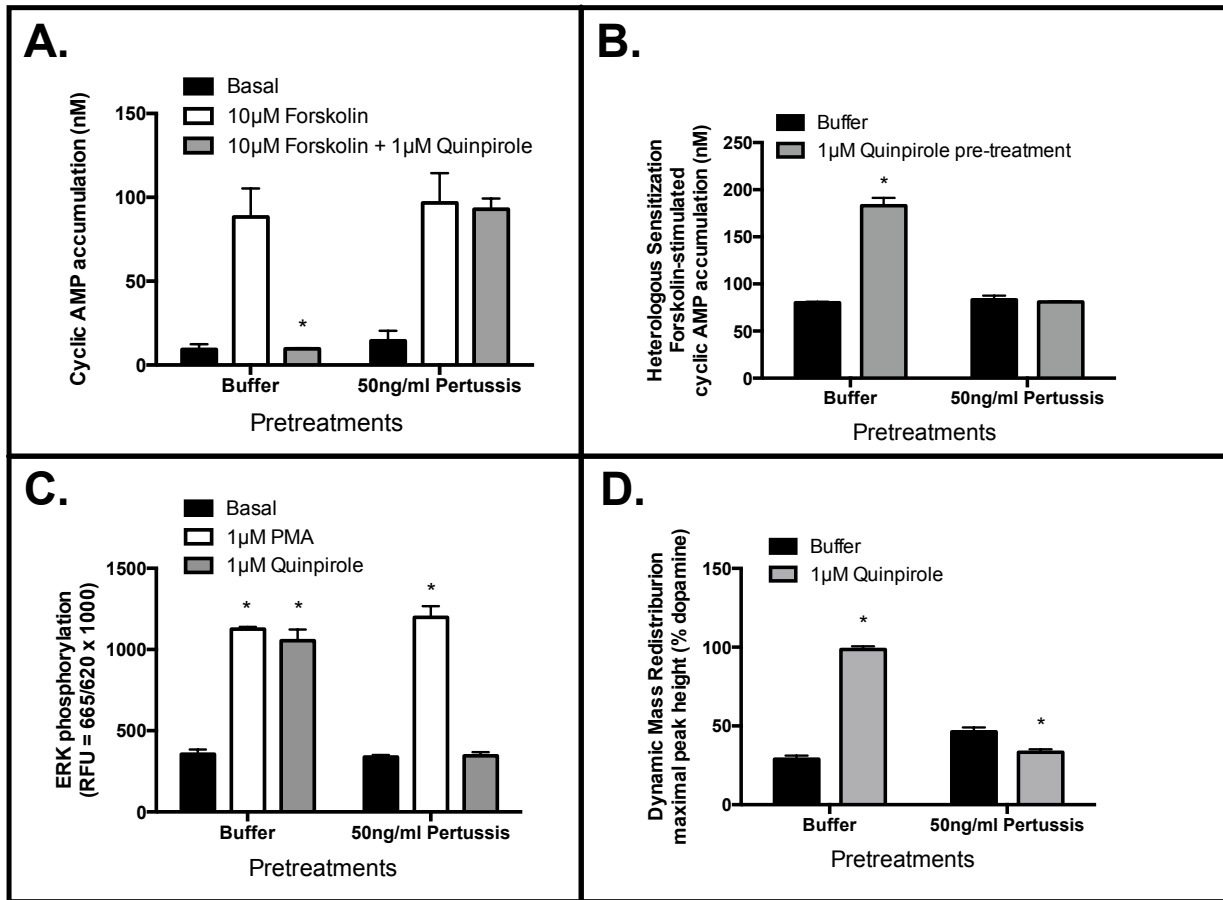

**Figure S5:** Effects of pertussis toxin pretreatment on  $G_{\alpha i/o}$  activation, heterologous sensitization, ERK phosphorylation, and DMR. Cells were treated overnight (16-18 h) with 50 ng/ml before the functional assays were initiated. Pertussis treatment inhibited quinpirole-mediated inhibition of cAMP production (A.), heterologous sensitization (B.),  $D_2$  receptor-mediated ERK phosphorylation (C.), quinpirole-induced DMR changes (D.). Data are the average and S.E.M. of at least three independent experiments. \* $p < 0.05$  ( $t$  test with Holm-Sidak method comparing 10 µM forskolin with 10 µM forskolin + 1 µM quinpirole [A.], buffer with 1 µM quinpirole [B. and D.], and basal with 1µM PMA or 1 µM quinpirole [C.]).
